# Supplementary material for: Solvent-responsive cavitand lanthanum complex
Source: Royal Society of Chemistry journal article supplement (doi:10.1039/c9dt03199e), 2019-01-01
Supplement: c9dt03199e1.pdf [file c9dt03199e1.pdf]

## Electronic Supplementary Information for

# Solvent-responsive cavitand lanthanum complex

*Francesca Guagnini,<sup>a</sup> Alessandro Pedrini,<sup>a</sup> Timothy M. Swager,<sup>b</sup> Chiara Massera,<sup>a\*</sup> Enrico Dalcanale<sup>a\*</sup>*

<sup>a</sup>Dipartimento di Scienze Chimiche, della Vita e della Sostenibilità Ambientale and INSTM UdR  
Parma, Università di Parma, Parco Area delle Scienze 17/A, 43123 Parma (PR), Italy

<sup>b</sup>Department of Chemistry and Institute for Soldier Nanotechnologies, Massachusetts Institute of  
Technology, 77 Massachusetts Avenue, Cambridge, Massachusetts 02139, United States

### Table of contents

|                                                 |     |
|-------------------------------------------------|-----|
| 1. NMR spectra .....                            | S2  |
| 2. ITC experiments.....                         | S8  |
| 3. X-Ray Crystallography .....                  | S10 |
| 4. Radius Models .....                          | S15 |
| 5. 1D NMR study of solvent responsiveness ..... | S17 |

# 1. NMR spectra

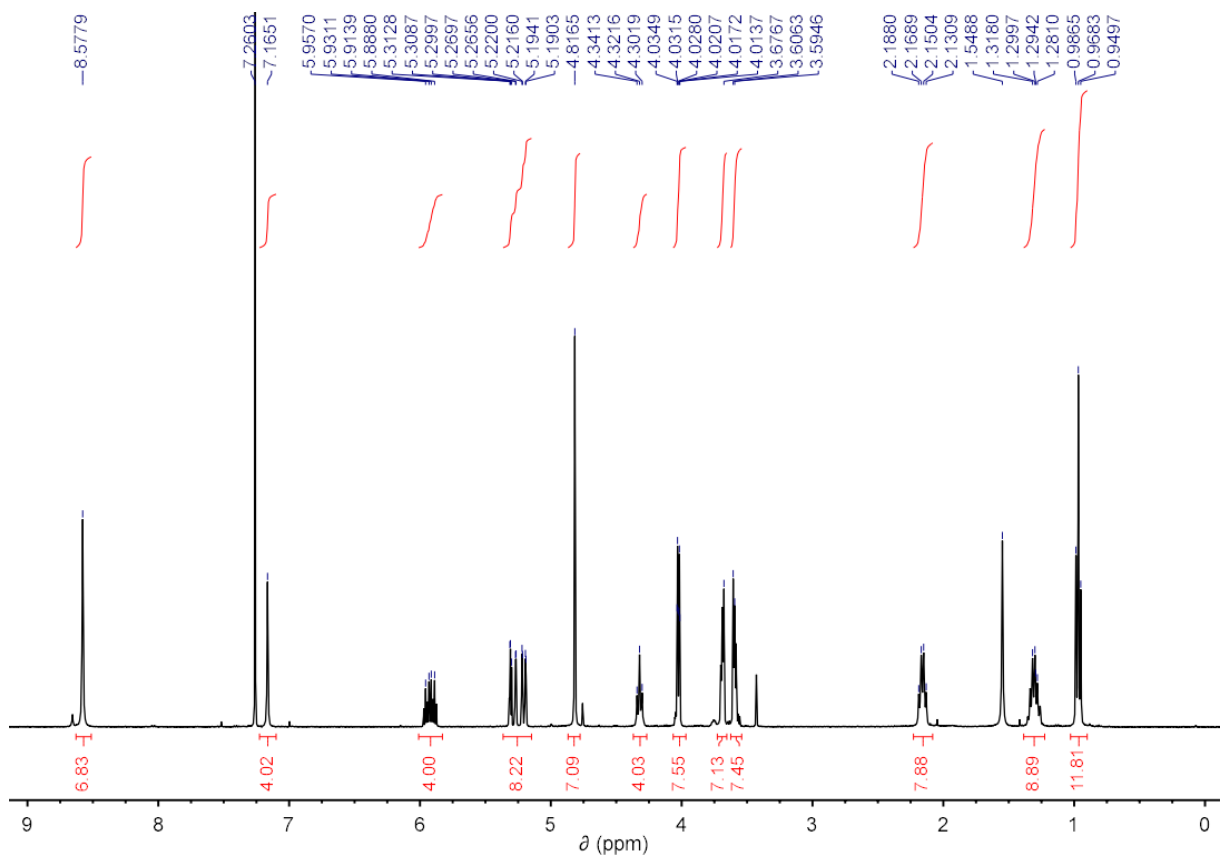

Figure S1.  $^1\text{H}$  NMR ( $\text{CDCl}_3$ , 400 MHz, 298 K) of resorcinarene **II**.

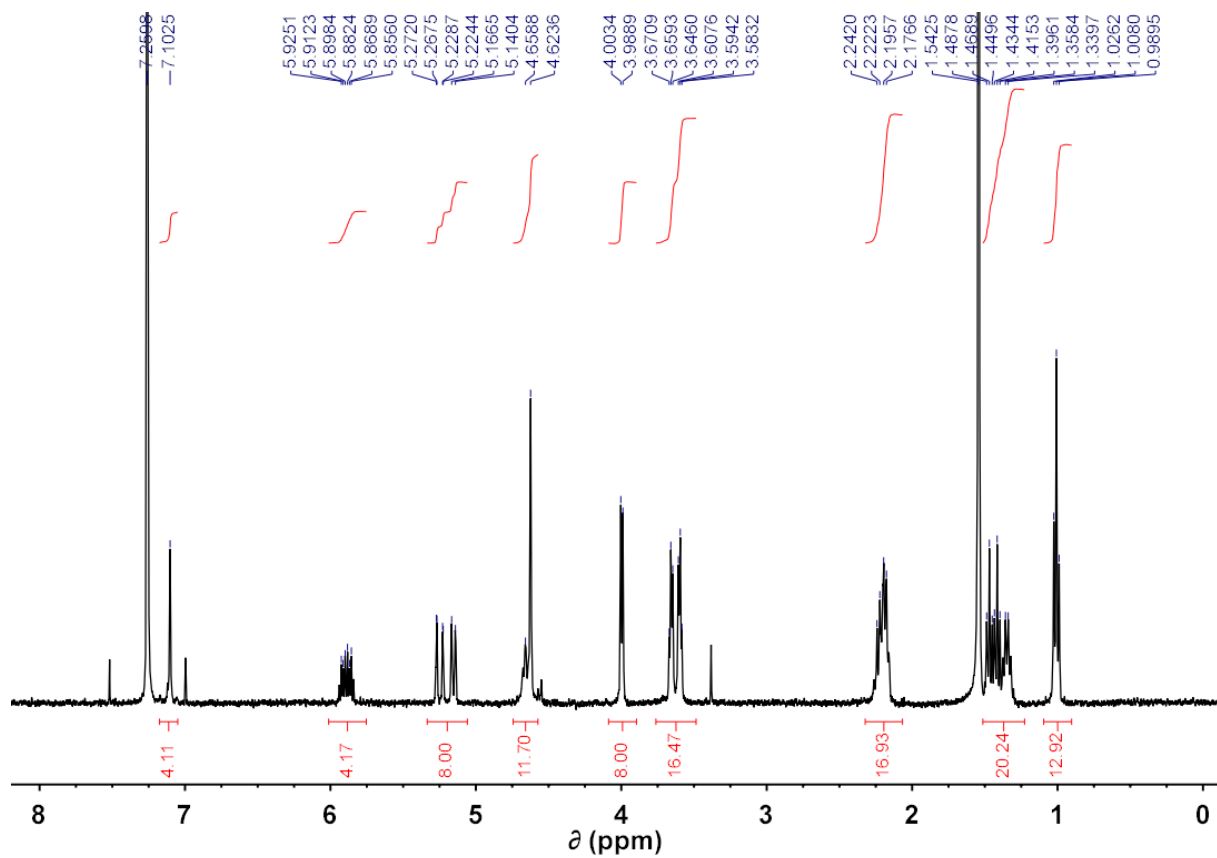

**Figure S2.**  $^1\text{H}$  NMR ( $\text{CDCl}_3$ , 400 MHz, 298 K) of tetraphosphonate cavitand **III**.

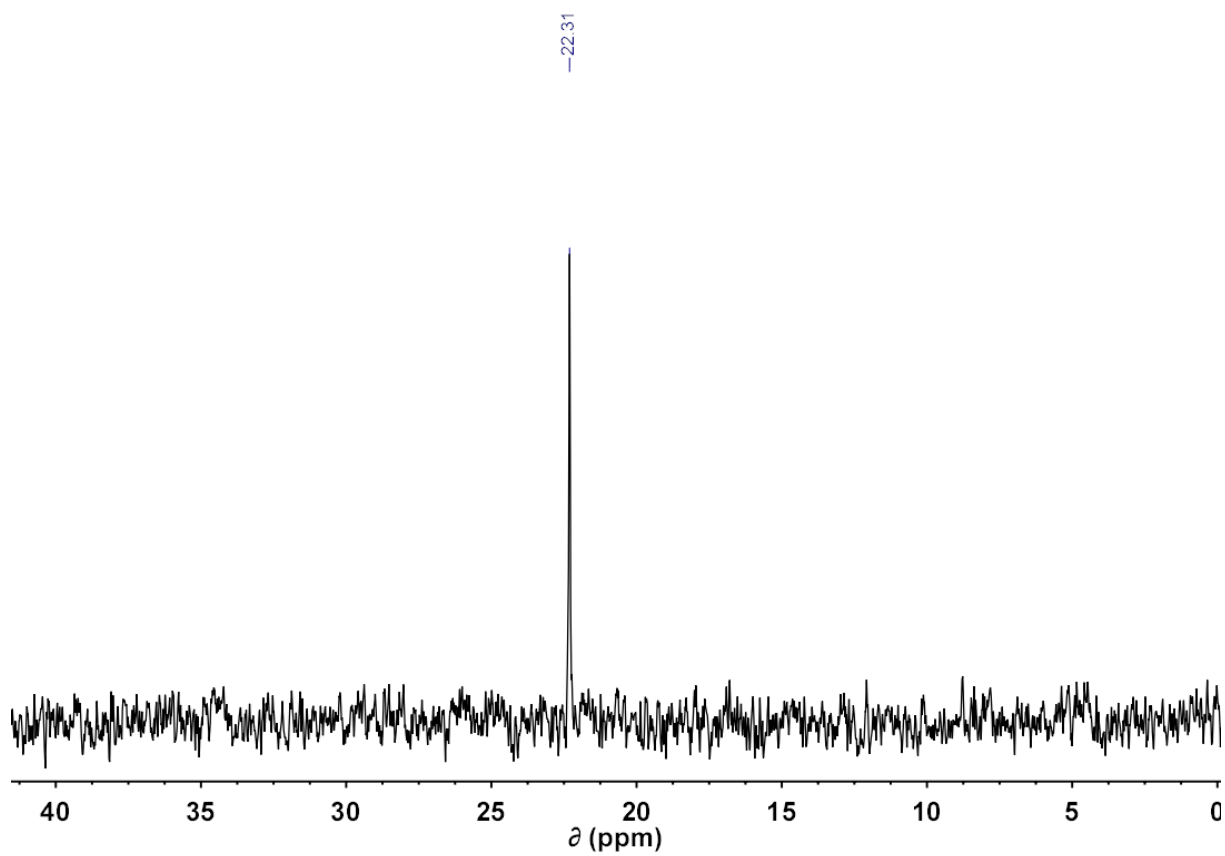

**Figure S3.**  $^{31}\text{P}$  NMR ( $\text{CDCl}_3$ , 162 MHz, 298 K) of tetrakisphosphate cavitand **III**.

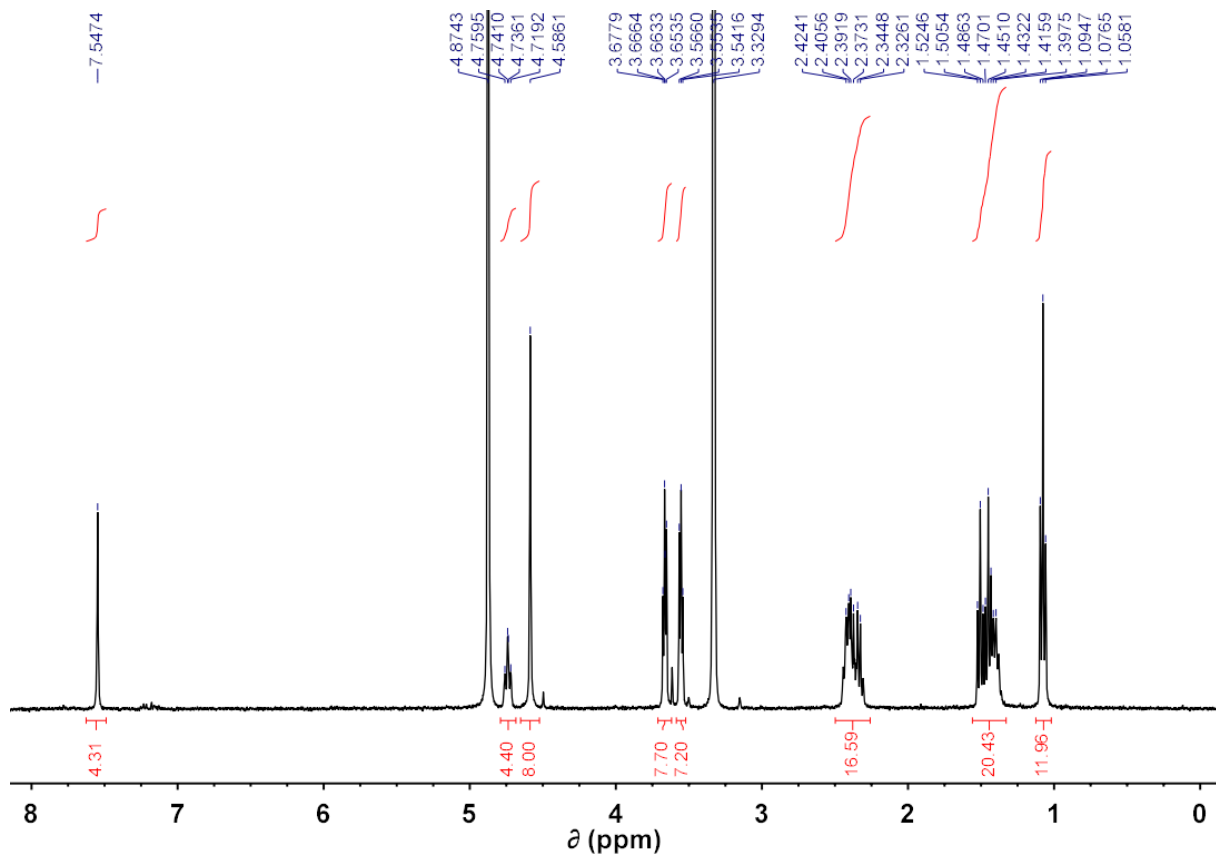

**Figure S4.**  $^1\text{H}$  NMR ( $\text{CD}_3\text{OD}$ , 400 MHz, 298 K) of tetraphosphonate cavitand **1**.

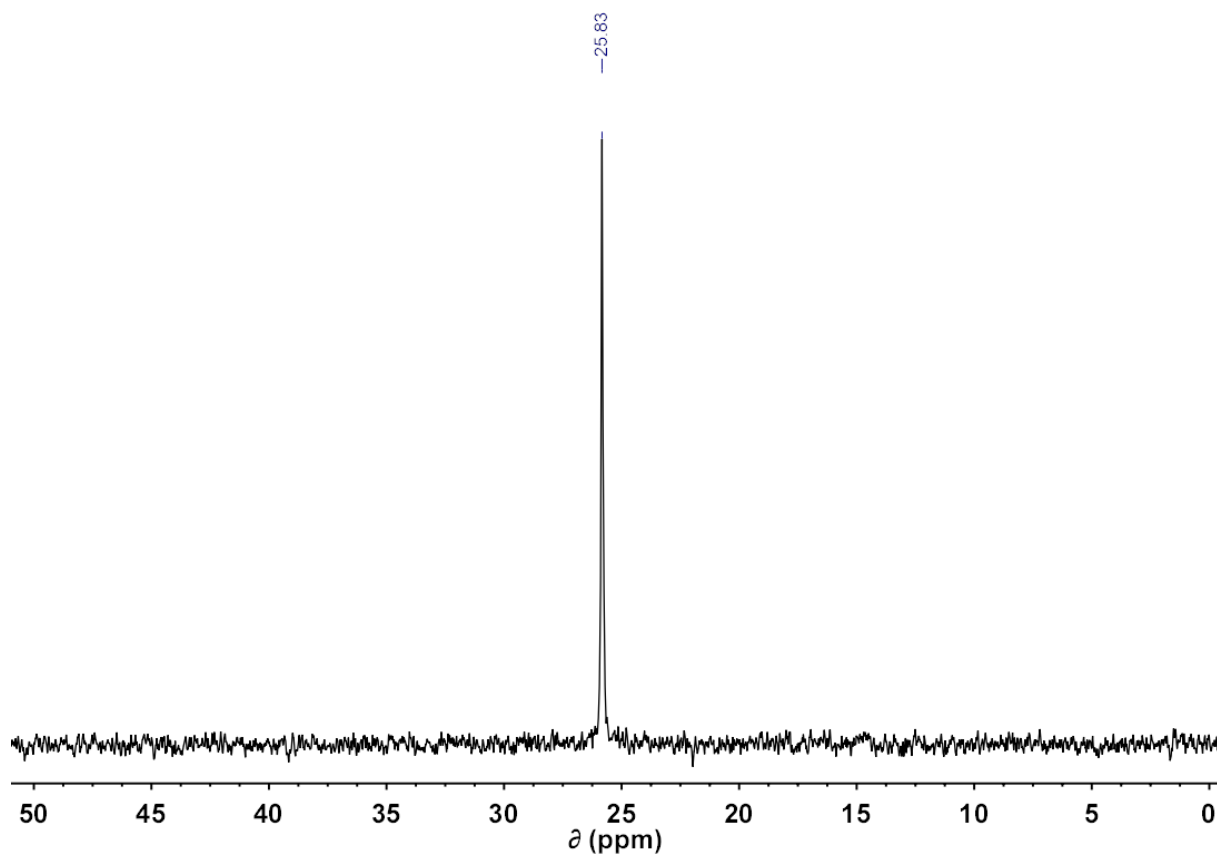

**Figure S5.**  $^{31}\text{P}$  NMR ( $\text{CD}_3\text{OD}$ , 162 MHz, 298 K) of tetraphosphonate cavitand **1**.

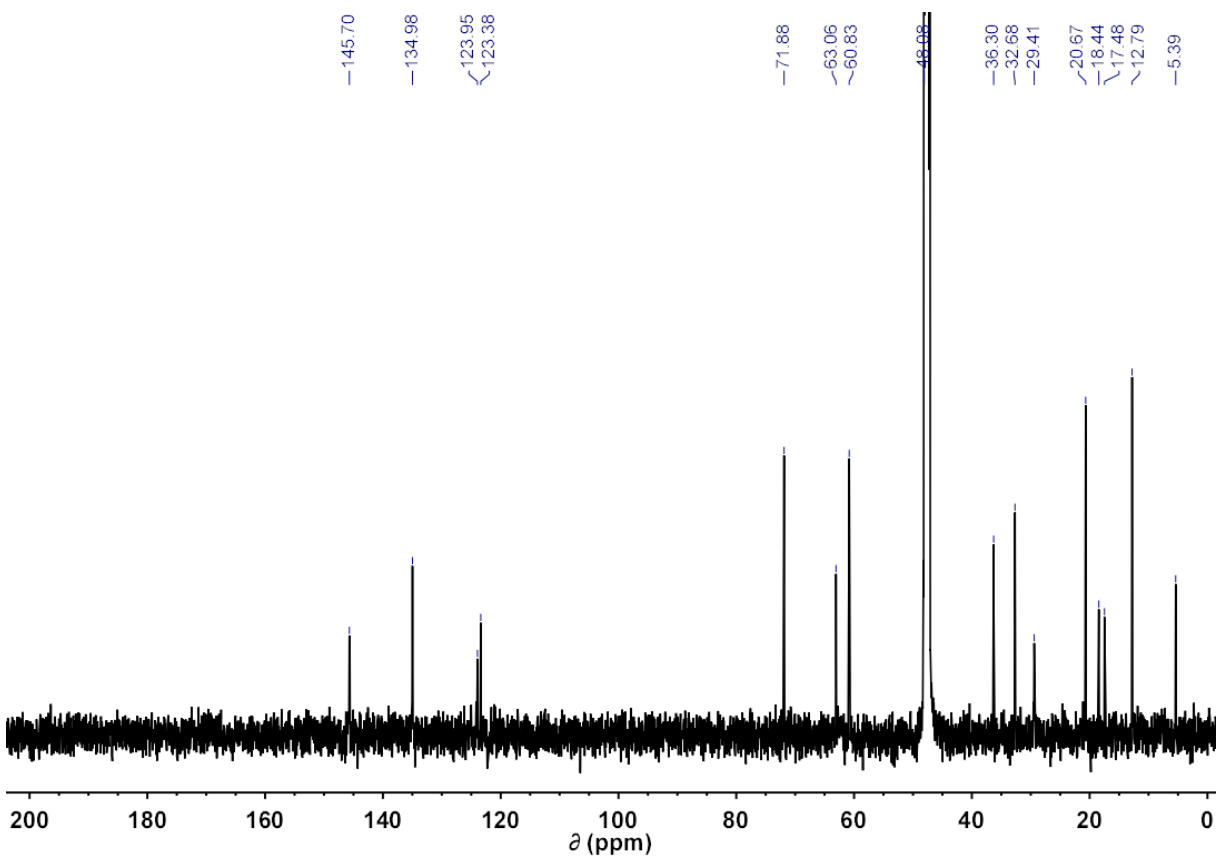

**Figure S6.**  $^{13}\text{C}$  NMR ( $\text{CD}_3\text{OD}$ , 100 MHz, 298 K) of tetraphosphonate cavitand **1**.

## 2. ITC experiments

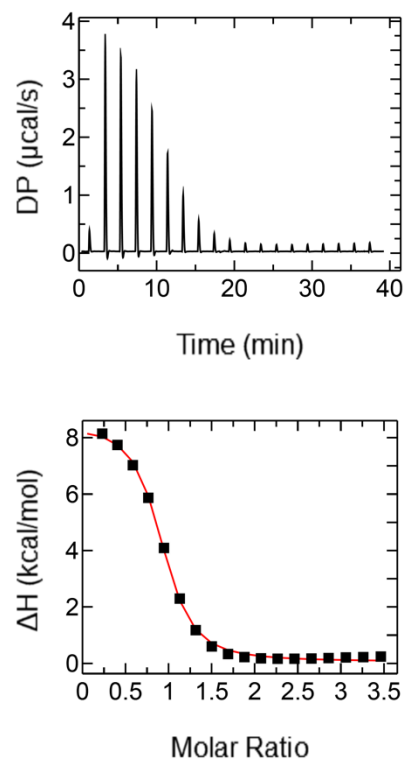

**Figure S7.** ITC titration of **1** and  $\text{LaCl}_3$  in acetonitrile;  $[\text{cavitand}] = 2.07 \text{ mM}$ ;  $[\text{LaCl}_3] = 0.12 \text{ mM}$ .



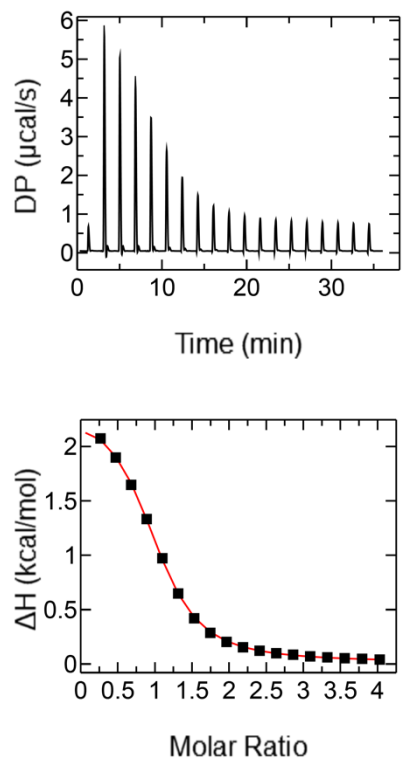

**Figure S8.** ITC titration of 1 and  $\text{LaCl}_3$  in acetone;  $[\text{cavitand}] = 11.1 \text{ mM}$ ;  $[\text{LaCl}_3] = 0.54 \text{ mM}$ .

### 3. X-Ray Crystallography

**Table S1.** Crystallographic data for La-1

| Formula                                                             | $C_{68}H_{116}Cl_3LaN_4O_{30}P_4$ |
|---------------------------------------------------------------------|-----------------------------------|
| Formula weight                                                      | 1838.78                           |
| Crystal system                                                      | Triclinic                         |
| Space group                                                         | <i>P</i> -1                       |
| <i>a</i> /Å                                                         | 14.6516(2)                        |
| <i>b</i> /Å                                                         | 15.3311(3)                        |
| <i>c</i> /Å                                                         | 20.0375(5)                        |
| $\alpha$ °                                                          | 92.916(1)                         |
| $\beta$ °                                                           | 95.482(1)                         |
| $\gamma$ °                                                          | 92.327(1)                         |
| <i>V</i> /Å <sup>3</sup>                                            | 4469.9(2)                         |
| <i>Z</i>                                                            | 2                                 |
| <i>D<sub>c</sub></i> /g cm <sup>-3</sup>                            | 1.366                             |
| <i>F</i> (000)                                                      | 1920                              |
| $\mu$ /mm <sup>-1</sup>                                             | 0.715                             |
| $\theta_{min,max}$ °                                                | 2.501-28.285                      |
| Reflections collected                                               | 59535                             |
| Independent reflections                                             | 20927 [R(int) = 0.0519]           |
| Observed reflections                                                | 16270                             |
| Data/restr./param.                                                  | 20927 / 6 / 1073                  |
| <i>S</i> <sup>a</sup>                                               | 1.015                             |
| R[ <i>F</i> <sub>o</sub> >4σ( <i>F</i> <sub>o</sub> )] <sup>b</sup> | 0.0498                            |
| wR <sub>2</sub> <sup>b</sup>                                        | 0.1248                            |
| $\Delta\rho_{min,max}$ /e Å <sup>-3</sup>                           | 2.064, -1.479                     |

<sup>a</sup>Goodness-of-fit  $S = [\sum w(F_o^2 - F_c^2)^2 / (n-p)]^{1/2}$ , where *n* is the number of reflections and *p* the number of parameters. <sup>b</sup> $R_1 = \sum ||F_o| - |F_c|| / \sum |F_o|$ ,  $wR_2 = [\sum [w(F_o^2 - F_c^2)^2] / \sum [w(F_o^2)^2]]^{1/2}$ .

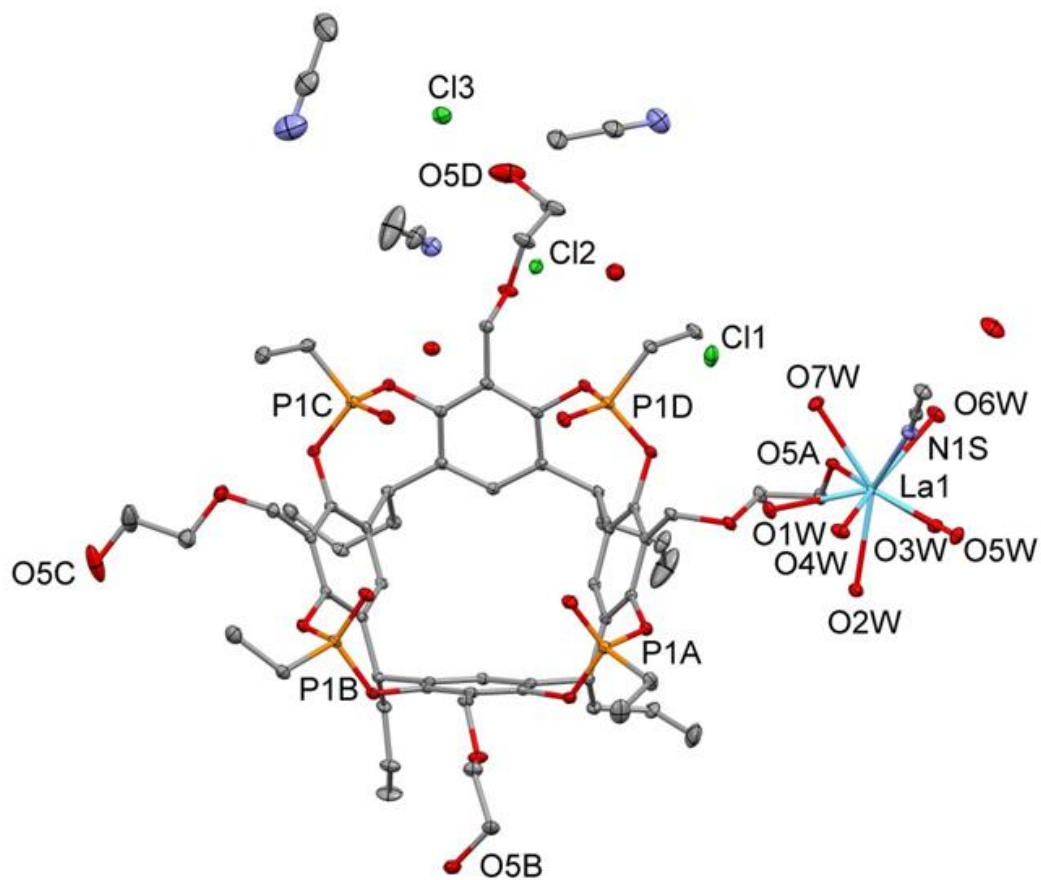

**Figure S9.** Ortep view of La-1 with partial atom labelling scheme and displacement ellipsoids drawn at the 20% probability level. H atoms have been omitted for clarity.

**Table S2.** Selected bond lengths (Å) in La-1.

|         |          |         |          |
|---------|----------|---------|----------|
| La1-N1S | 2.732(4) | La1-O4W | 2.529(3) |
| La1-O5A | 2.537(2) | La1-O5W | 2.523(3) |
| La1-O1W | 2.542(3) | La1-O6W | 2.511(3) |
| La1-O2W | 2.529(4) | La1-O7W | 2.513(3) |
| La1-O3W | 2.632(3) |         |          |

**Table S3.** H bonding parameters (Å, °) in La-1.

| <b>Donor-H</b>       | <b>Donor...Acceptor</b>             | <b>H...Acceptor</b>                | <b>Donor-H...Acceptor</b>              |
|----------------------|-------------------------------------|------------------------------------|----------------------------------------|
| O1W-H2W<br>0.854(3)  | O1W...O4A<br>2.814(4)               | H2W...O4A<br>1.97(3)               | O1W-H2W...O4A<br>170.2(2)              |
| O7W-H14W<br>0.807(9) | O7W...C11<br>3.162(3)               | H14W...C11<br>2.37(8)              | O7W-H14W...C11<br>165.9(9)             |
| O8W-H15W<br>0.800    | O8W...C12<br>3.216(3)               | H15W...C12<br>2.47                 | O8W-H15W...C12<br>157                  |
| O8W-H16W<br>0.800    | O8W...O3C<br>2.700(4)               | H16W...O3C<br>1.92                 | O8W-H16W...O3C<br>163                  |
| O10W-H19W<br>0.800   | O10W...C11<br>3.179(4)              | H19W...C11<br>2.39                 | O10W-H19W...C11<br>168                 |
| O10W-H20W<br>0.800   | O20W...C12<br>3.200(3)              | H20W...C12<br>2.44                 | O10W-H20W...C12<br>168                 |
| O9W-H17W<br>0.800    | O9W...O3B <sup>i</sup><br>2.841(4)  | H17W...O3B <sup>i</sup><br>2.06    | O9W-H17W...O3B <sup>i</sup><br>167     |
| O2W-H4W<br>0.76(5)   | O2W...O10W <sup>i</sup><br>2.762(5) | H4W...O10W <sup>i</sup><br>2.00(9) | O2W-H4W...O10W <sup>i</sup><br>178(5)  |
| O4W-H7W<br>0.98(6)   | O4W...O3D <sup>i</sup><br>2.713(4)  | H7W...O3D <sup>i</sup><br>1.74(6)  | O4W-H7W...O3D <sup>i</sup><br>171(2)   |
| O7W-H13W<br>0.66(6)  | O7W...O3A <sup>i</sup><br>2.729(5)  | H13W...O3A <sup>i</sup><br>2.09(7) | O7W-H13W...O3A <sup>i</sup><br>165(4)  |
| O1W-H1W<br>0.849(3)  | O1W...C11 <sup>i</sup><br>3.117(3)  | H1W...C11 <sup>i</sup><br>2.272(1) | O1W-H1W...C11 <sup>i</sup><br>173.2(2) |

|                      |                                       |                                        |                                           |
|----------------------|---------------------------------------|----------------------------------------|-------------------------------------------|
| O5W-H10W<br>0.872(3) | O5W...O8W <sup>i</sup><br>2.707(4)    | H10W...O8W <sup>i</sup><br>1.931(3)    | O5W-H10W...O8W <sup>i</sup><br>147.5(2)   |
| O4W-H8W<br>0.77(7)   | O4W...O10W <sup>i</sup><br>3.378(5)   | H8W...O10W <sup>i</sup><br>2.78(7)     | O4W-H8W...O10W <sup>i</sup><br>134(7)     |
| O4W-H8W<br>0.77(7)   | O4W...Cl2 <sup>i</sup><br>3.330(3)    | H8W...Cl2 <sup>i</sup><br>2.64(7)      | O4W-H8W...Cl2 <sup>i</sup><br>151(6)      |
| O5W-H9W<br>0.872(3)  | O5W...Cl2 <sup>ii</sup><br>3.101(3)   | H9W...Cl2 <sup>ii</sup><br>2.352(1)    | O5W-H9W...Cl2 <sup>ii</sup><br>144.1(2)   |
| O2W-H3W<br>0.98(6)   | O2W...O8W <sup>ii</sup><br>2.776(4)   | H9W... O8W <sup>ii</sup><br>1.78(6)    | O2W-H3W...O8W <sup>ii</sup><br>174(5)     |
| O3W-H6W<br>0.883(3)  | O3W... Cl3 <sup>ii</sup><br>3.091(3)  | H6W... Cl3 <sup>ii</sup><br>2.220(1)   | O3W-H6W...Cl3 <sup>ii</sup><br>168.5(2)   |
| O6W-H11W<br>0.871(3) | O6W... Cl3 <sup>ii</sup><br>3.124(3)  | H11W... Cl3 <sup>ii</sup><br>2.310(1)  | O6W-H11W...Cl3 <sup>ii</sup><br>155.7(2)  |
| O5C-H5C<br>0.840(7)  | O5C... Cl3 <sup>iii</sup><br>3.068(7) | H5C... Cl3 <sup>iii</sup><br>2.251(1)  | O5C-H5C...Cl3 <sup>iii</sup><br>164.6(5)  |
| O5B-H5OB<br>0.840(3) | O5B... Cl1 <sup>iii</sup><br>3.083(3) | H5OB... Cl1 <sup>iii</sup><br>2.287(1) | O5B-H5OB...Cl1 <sup>iii</sup><br>158.2(2) |
| O9W-H18W<br>0.800    | O9W... N2Si <sup>v</sup><br>2.980(7)  | H18W... N2Si <sup>v</sup><br>2.23      | O9W-H18W...N2Si <sup>v</sup><br>155       |

i = -x+1,-y,-z+1; ii = x-1,+y,+z; iii = x,+y-1,+z; iv = -x+1,-y+1,-z+1

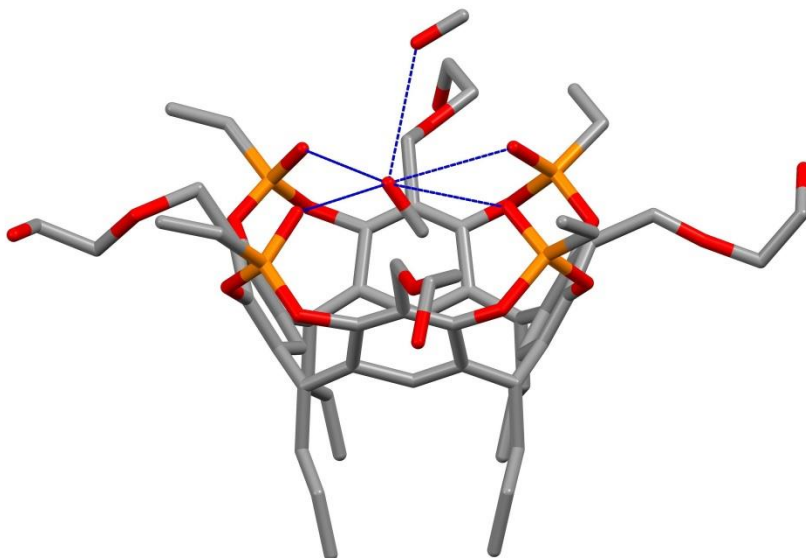

**Figure S10.** Molecular structure of cavitand **1** crystallized by slow evaporation of a solution of La-1 in methanol. The H-bond pattern is shown as blue dashed lines.

**Main crystallography data for cavitand 1 ( $C_{60}H_{84}P_4O_{20} \cdot 2CH_3OH$ ):** Monoclinic,  $C2/m$ ,  $a = 14.068(1) \text{ \AA}$ ,  $b = 23.176(2) \text{ \AA}$ ,  $c = 24.274(2) \text{ \AA}$ ,  $\beta = 93.678(3)^\circ$ ,  $V = 7898.1(11) \text{ \AA}^3$ ,  $Z = 8$ . Theta range for data collection:  $2.322$  to  $17.284^\circ$ . Reflections collected / unique:  $32510 / 2496$  [ $R(\text{int}) = 0.1176$ ].

## 4. Radius Models

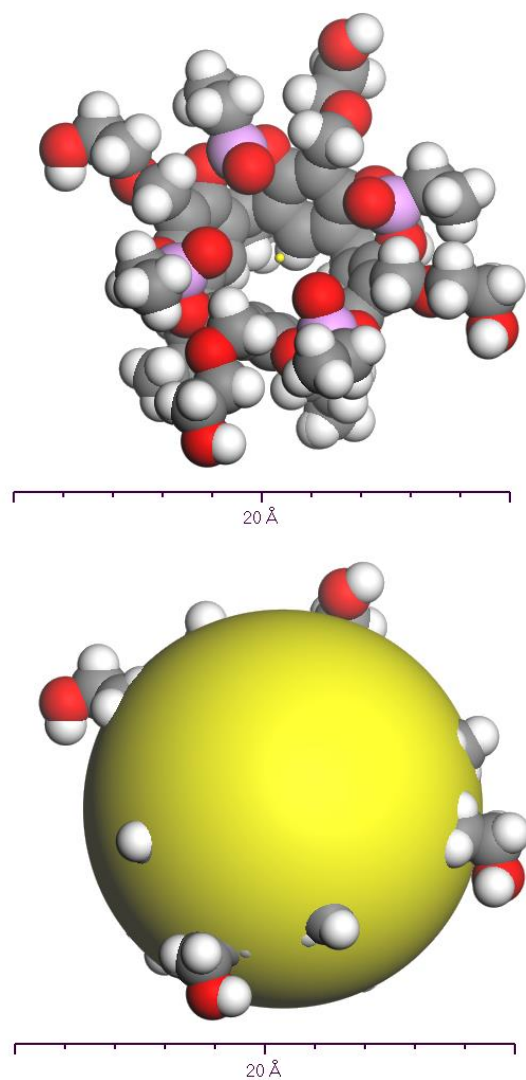

**Figure S11.** (top) Space-filling model for cavitant **1** showing calculated centroid (yellow dot); (bottom) sphere grown from the centroid with a radius of 8 Å.

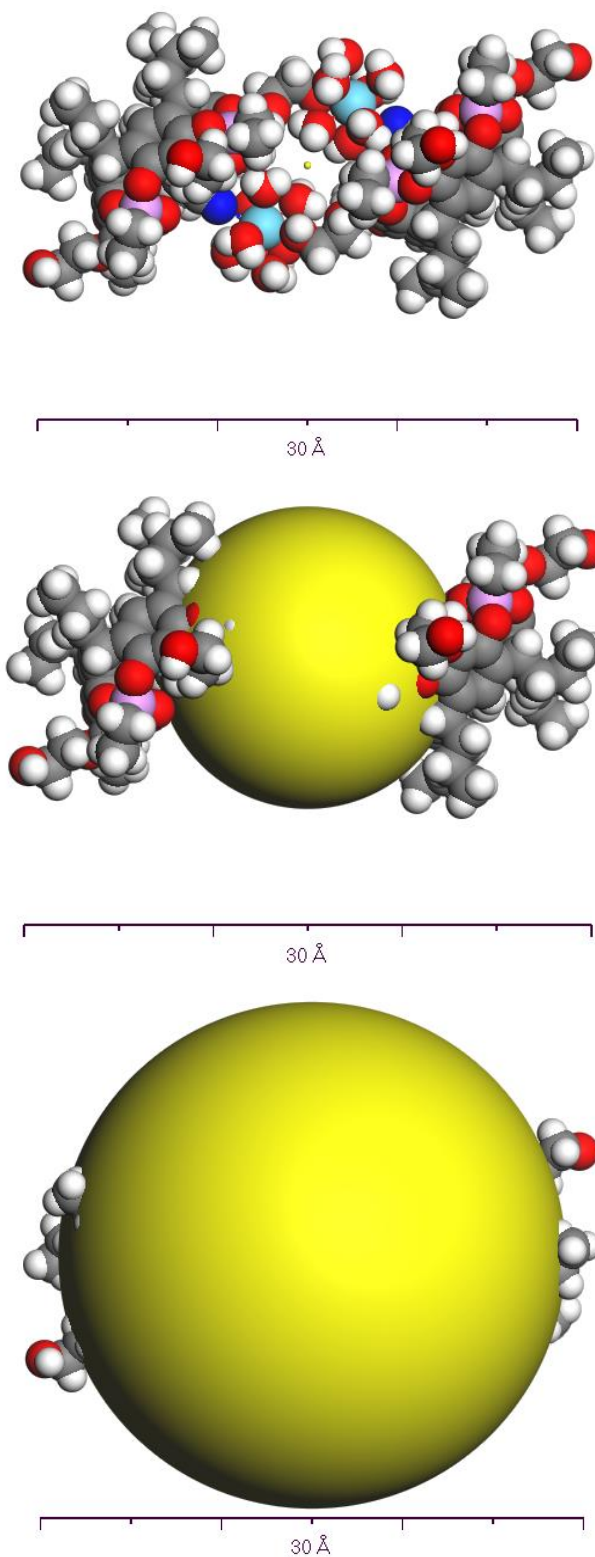

**Figure S12.** (top) Space-filling model for La-1 dimer showing calculated centroid (yellow dot); (middle) sphere grown from the centroid with a radius of 8 Å; (bottom) sphere grown from the centroid with a radius of 14 Å.



## 5. 1D NMR study of solvent responsiveness

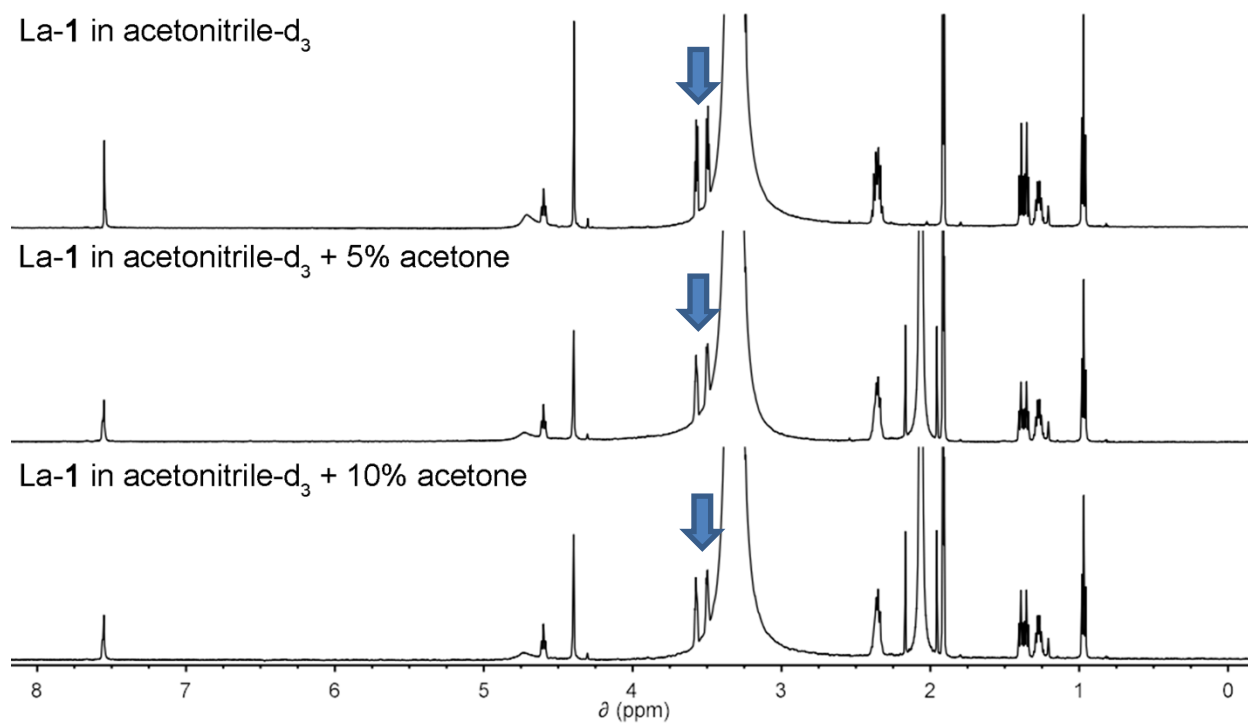

**Figure S13.**  $^1\text{H}$  NMR spectra of La-1 complex in acetonitrile- $\text{d}_3$  before (top) and after the addition of 5% (middle) and 10% (bottom) of acetone. The broadening of the signals related to the coordinating glycol units are evidenced by the arrows.
